# Supplementary material for: Amine-directed synthesis, valence state control, and optical properties of two new organic–inorganic tin chlorides
Source: Royal Society of Chemistry journal article supplement (doi:10.1039/d4dt01919a), 2024-01-01
Supplement: d4dt01919a1.pdf [file d4dt01919a1.pdf]

**Amine-directed synthesis, valence state control, and optical properties  
of two new organic-inorganic tin chlorides**

Xuemei Wen,<sup>a</sup> Gangji Yi,<sup>a</sup> Zhizhuan Zhang,<sup>a</sup> Caihong Guo,<sup>\*a</sup> Hongmei Zeng,<sup>a</sup> Ling Huang,<sup>b</sup> Guohong Zou<sup>a</sup> and Zhien Lin<sup>\*a</sup>

<sup>a</sup> *College of Chemistry, Sichuan University, Chengdu 610064, P. R. China.*

<sup>b</sup> *College of Chemistry and Materials Science, Sichuan Normal University, Chengdu 610068, China.*

\* To whom correspondence should be addressed. Tel: +86-28-85412284. E-mail:  
guocaihong@scu.edu.cn; zhienlin@scu.edu.cn.

Table S1. Hydrogen bonds for compound **1**

| D-H···A <sup>a</sup> | d(D-H) (Å) | d(H···A) (Å) | d(D···A) (Å) | <(DHA) (deg) |
|----------------------|------------|--------------|--------------|--------------|
| N1-H1B···Cl3#1       | 0.98       | 2.12         | 3.078(5)     | 166.8        |
| N2-H2···Cl4          | 0.98       | 2.05         | 3.005(8)     | 163.9        |

<sup>a</sup>Symmetry transformations used to generate equivalent atoms: #1 +X,1-Y,-1/2+Z.

Table S2. Hydrogen bonds for compound **2**

| D-H···A     | d(D-H) (Å) | d(H···A) (Å) | d(D···A) (Å) | <(DHA) (deg) |
|-------------|------------|--------------|--------------|--------------|
| N1-H1···Cl1 | 0.98       | 2.52         | 3.234(4)     | 129.3        |
| N1-H1···Cl6 | 0.98       | 2.59         | 3.372(4)     | 136.7        |
| N2-H2···Cl7 | 0.98       | 2.06         | 3.024(4)     | 166.8        |
| N3-H3···Cl7 | 0.98       | 2.10         | 3.062(4)     | 168.6        |

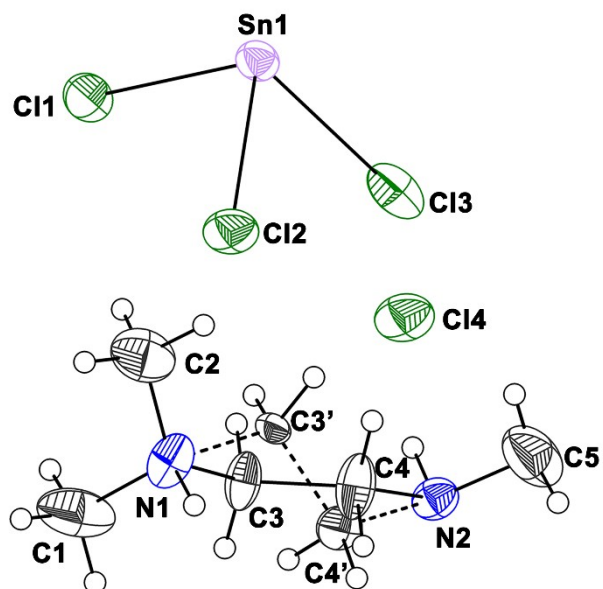

**Fig. S1** ORTEP plot of the asymmetric unit of compound **1**, showing the labeling scheme and the 50% probability displacement ellipsoids.

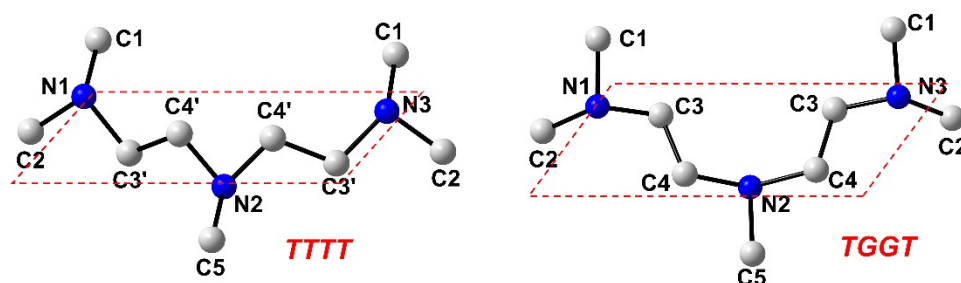

**Fig. S2** The *TTTT*- and the *TGGT*- conformations of two different statistical positions of the pmdeta molecules in compound **1**.

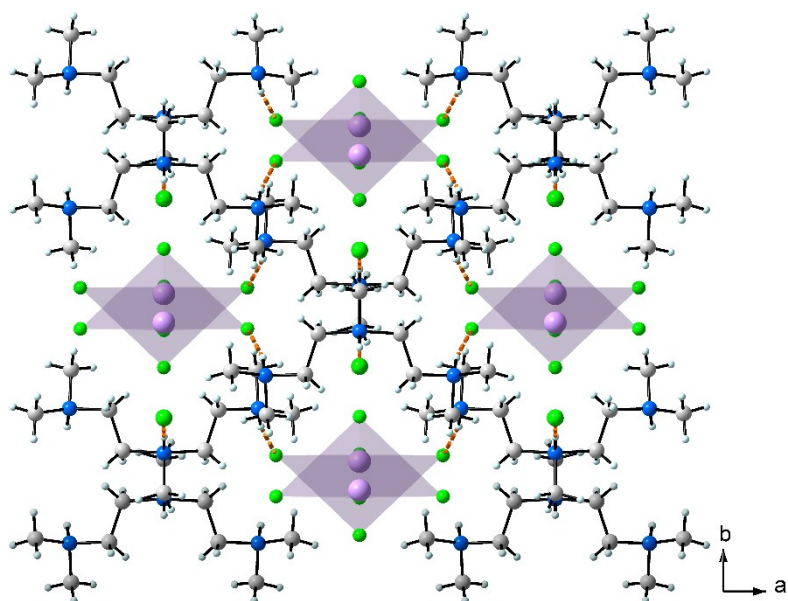

**Fig. S3** View of the hydrogen-bonded interaction between organic SDAs and inorganic anions in compound **1**.

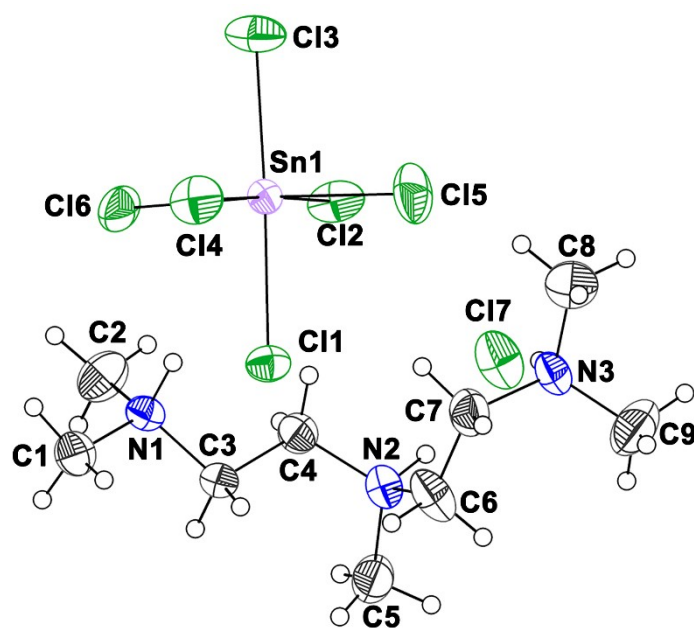

**Fig. S4** ORTEP plot of the asymmetric unit of compound **2**, showing the labeling scheme and the 50% probability displacement ellipsoids.

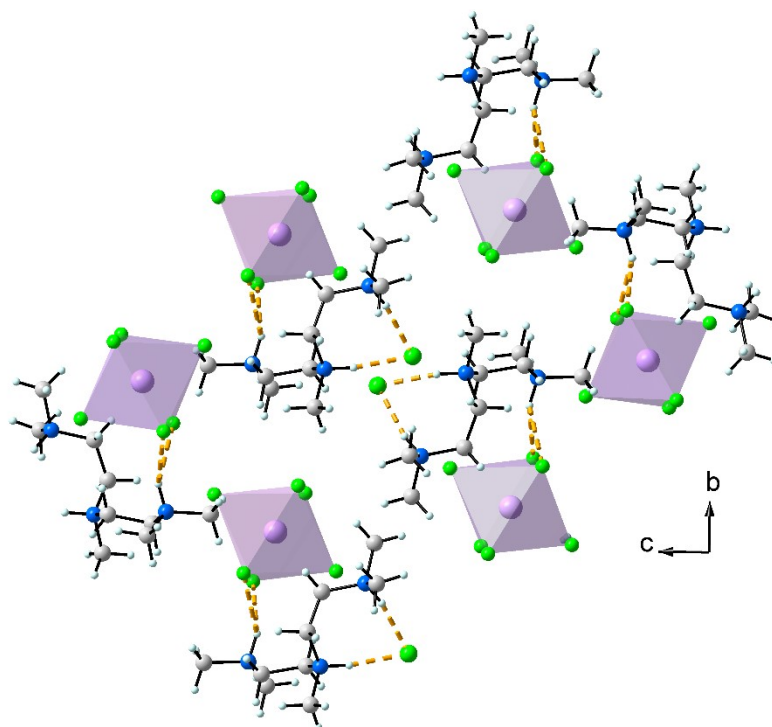

**Fig. S5** View of the hydrogen-bonded interaction between organic SDAs and inorganic anions in compound **2**.

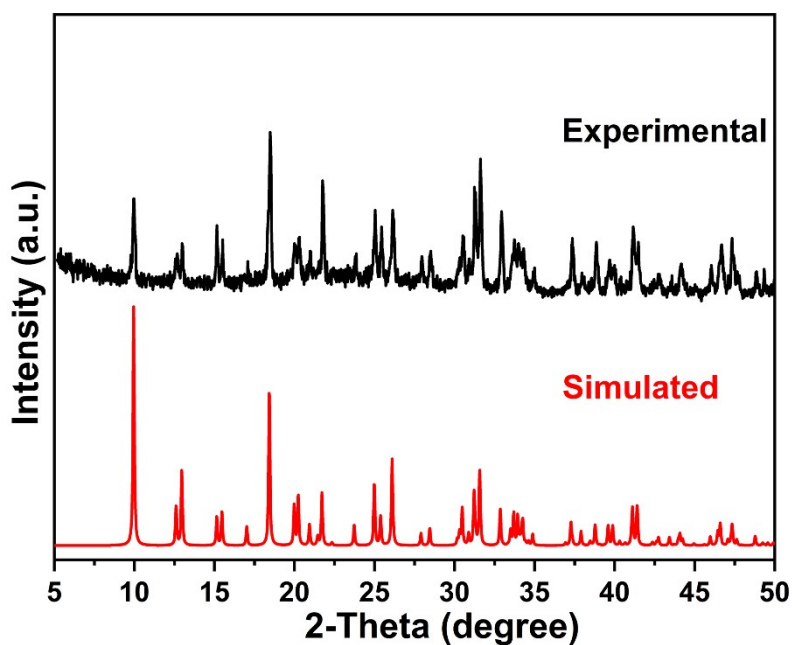

**Fig. S6** Experimental and simulated XRD patterns for compound **1**.

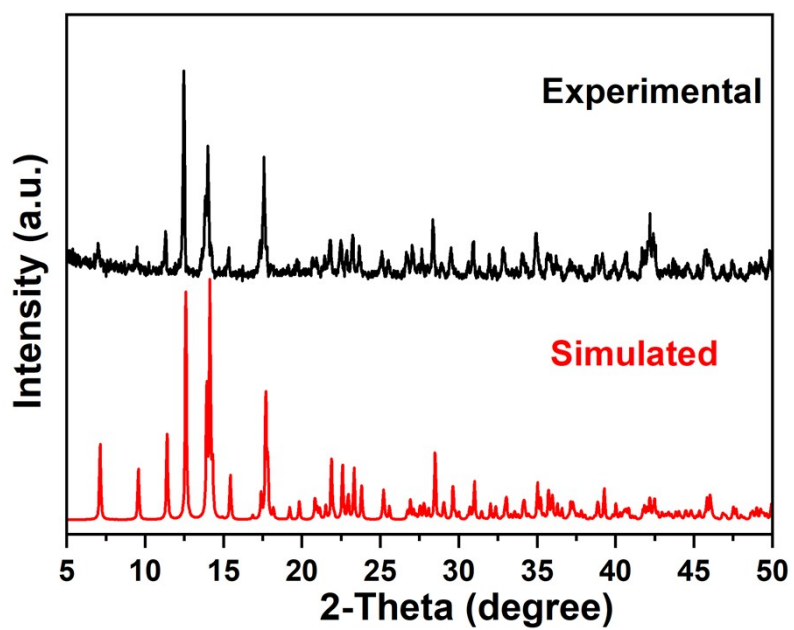

**Fig. S7** Experimental and simulated XRD patterns for compound 2.

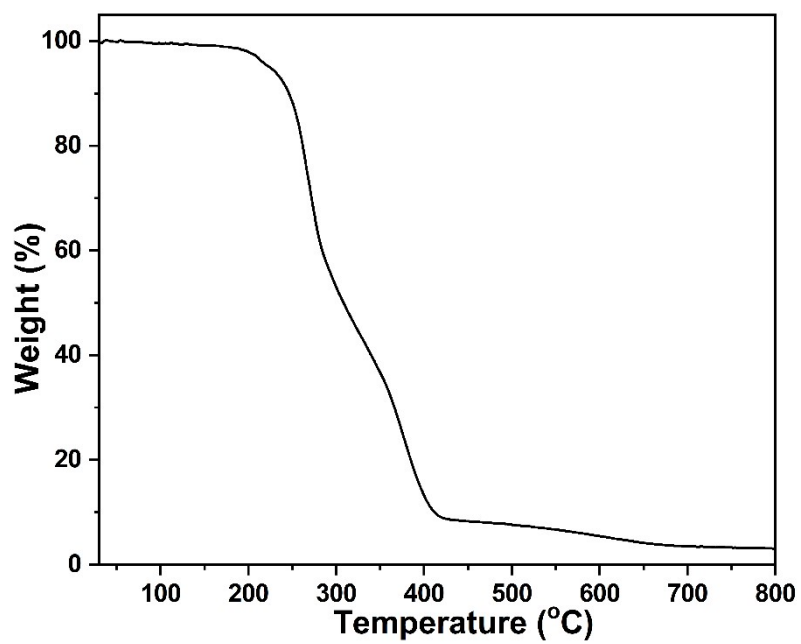

**Fig. S8** TGA curve of compound 1 under N<sub>2</sub> atmosphere.

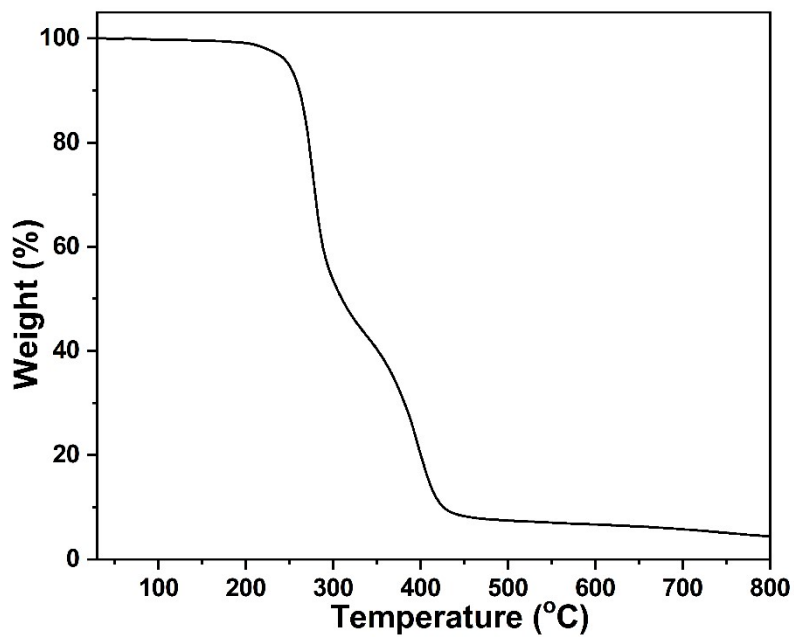

Fig. S9 TGA analysis of compound 2 under N<sub>2</sub> atmosphere.

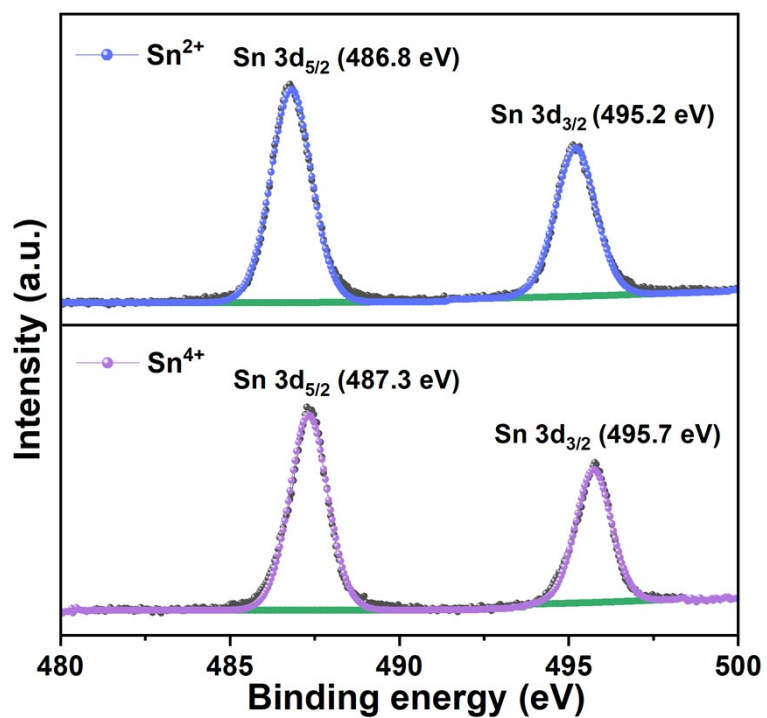

Fig. S10 Sn 3d XPS spectra of compounds 1 (top) and 2 (bottom).

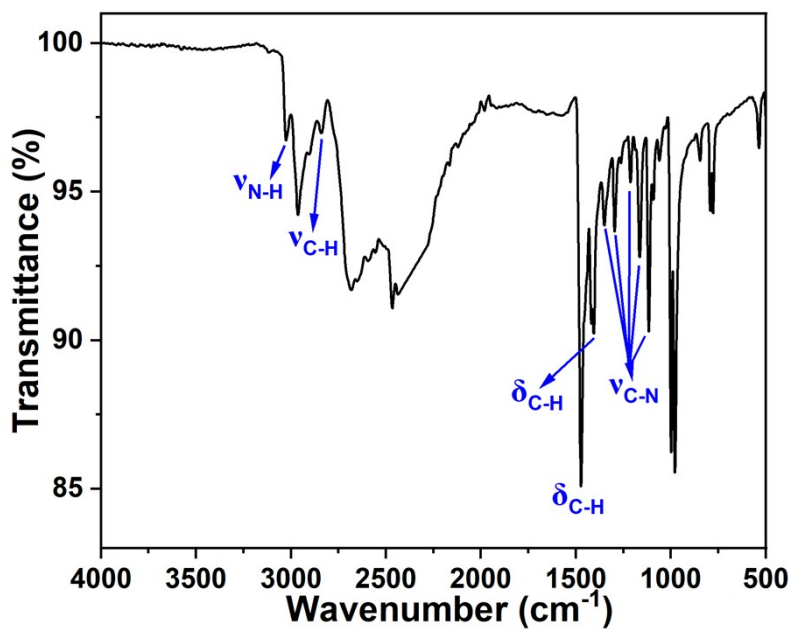

Fig. S11 IR spectrum of compound 1.

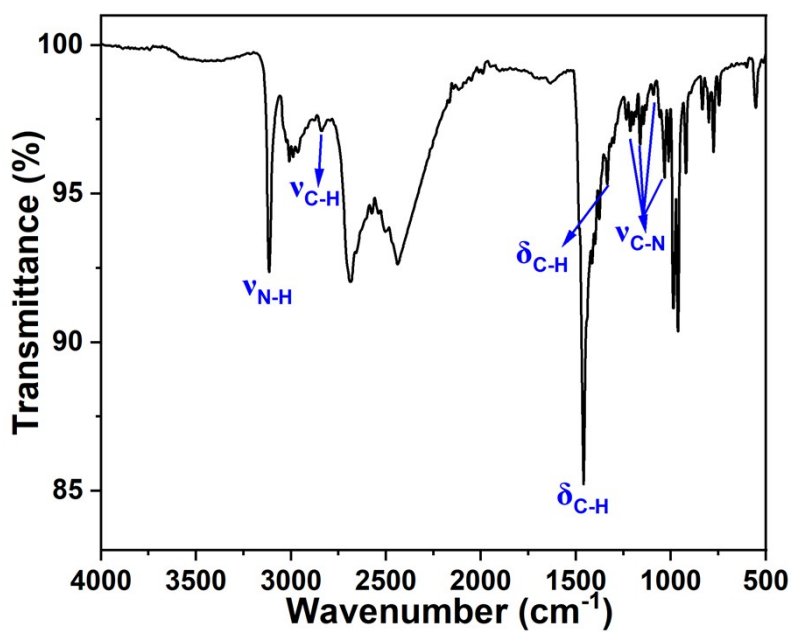

Fig. S12 IR spectrum of compound 2.



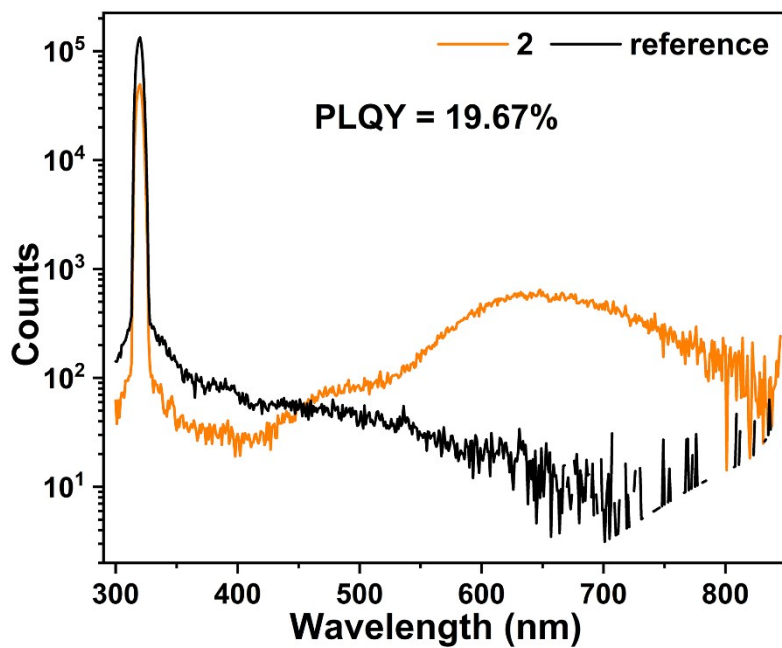

Fig. S13 The PLQY diagram of compound 2.

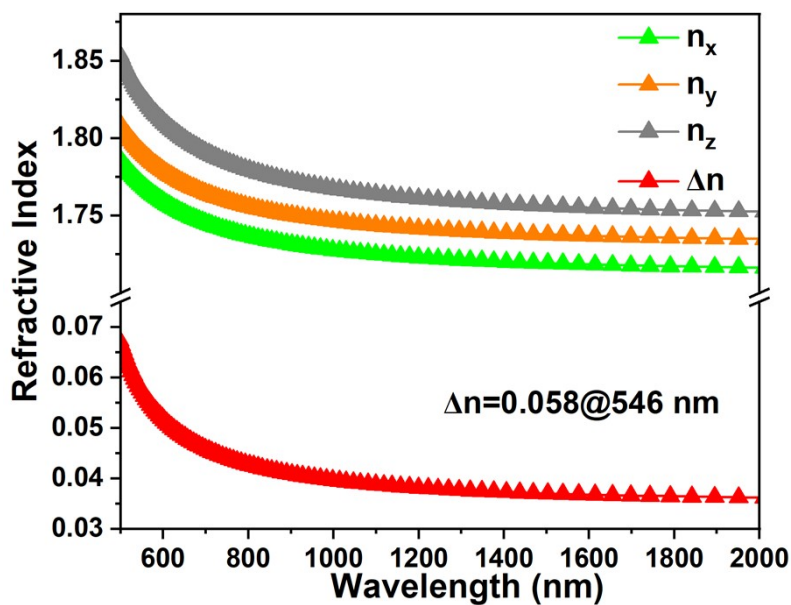

Fig. S14 Calculated dispersion of refractive index curves and birefringence of compound 1.

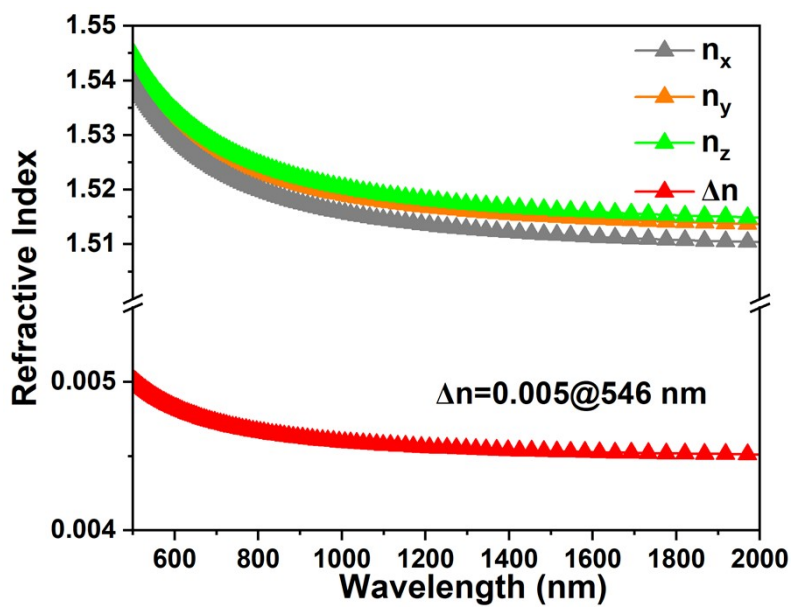

**Fig. S15** Calculated dispersion of refractive index curves and birefringence of compound 2.
